# Supplementary material for: DNA methylome and transcriptome landscapes revealed differential characteristics of dioecious flowers in papaya
Source: PubMed Central journal article supplement (PMC7261803; doi:10.1038/s41438-020-0298-0), 2020-06-01
Supplement: 41438_2020_298_MOESM1_ESM.pdf [file 41438_2020_298_MOESM1_ESM.pdf]

### CpG methylation clustering

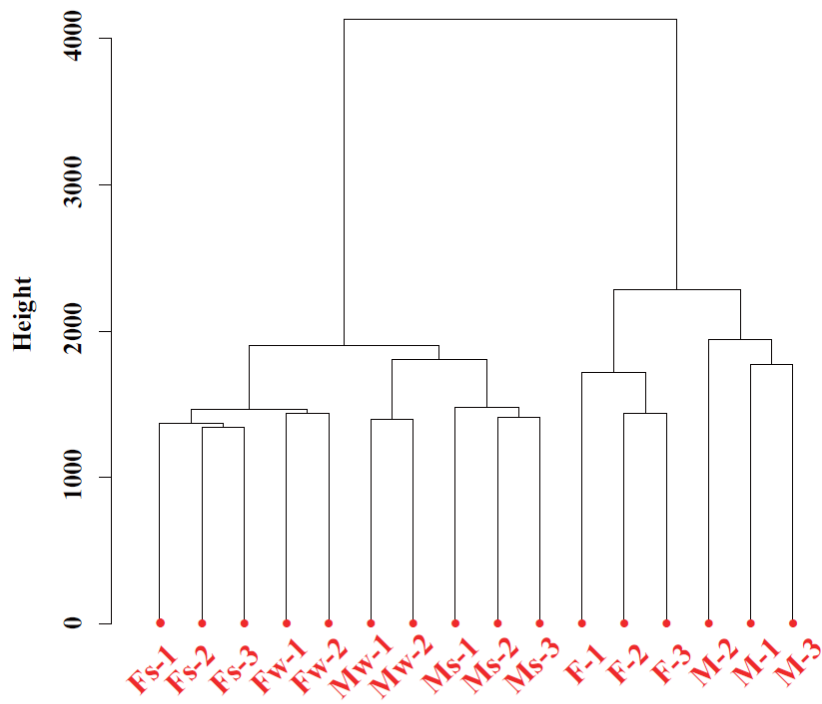

Samples  
Distance method: "euclidean"; Clustering method: "ward"

### CHG methylation clustering

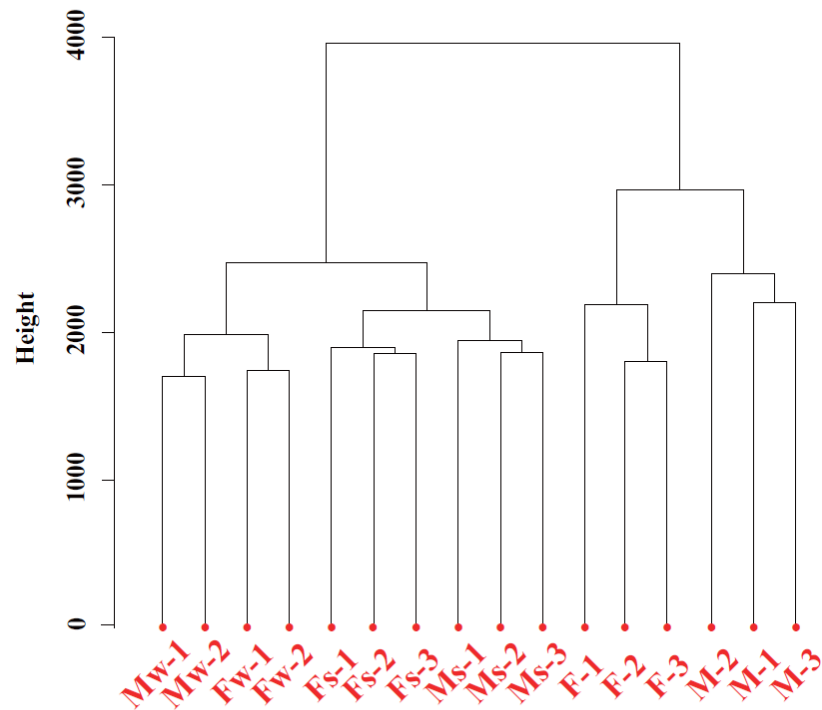

Samples  
Distance method: "euclidean"; Clustering method: "ward"

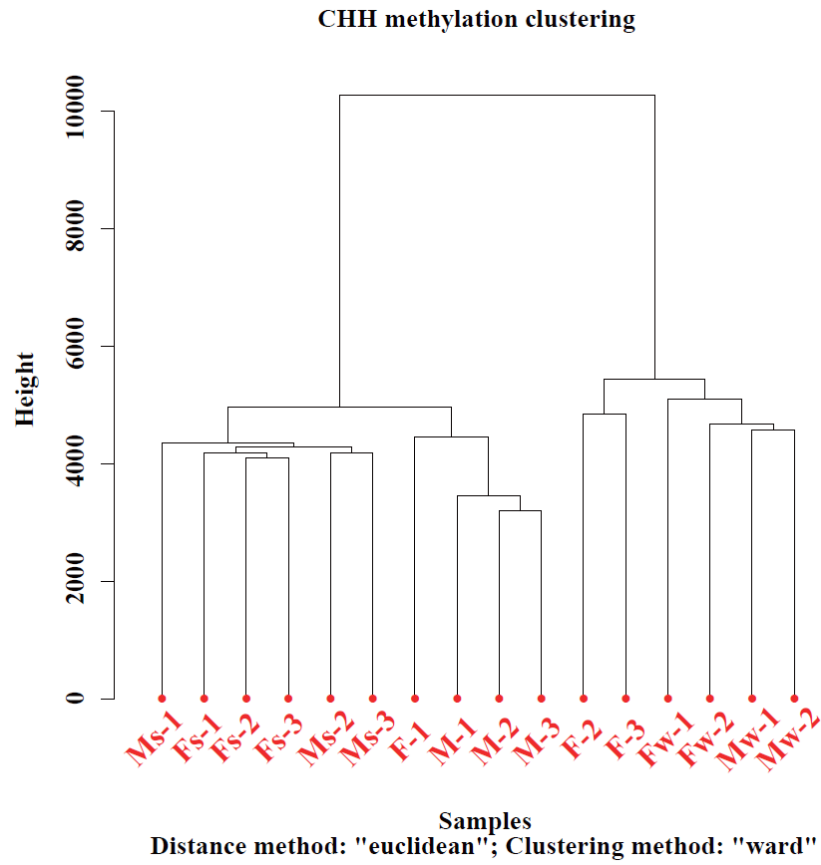

Supplementary Figure 1 Hierarchical clustering of 16 samples in CpG, CHG and CHH contexts
