# Supplementary material for: DNA methylome and transcriptome landscapes revealed differential characteristics of dioecious flowers in papaya
Source: PubMed Central journal article supplement (PMC7261803; doi:10.1038/s41438-020-0298-0), 2020-06-01
Supplement: 41438_2020_298_MOESM3_ESM.pdf [file 41438_2020_298_MOESM3_ESM.pdf]

Supplementary Table 1 Summary of bisulfite sequencing data

| Sample source            | Sample names | Total number of sequence pairs | Theoretical sequencing depth | Total number of observed cytosines (at least 6 reads coverage) |
|--------------------------|--------------|--------------------------------|------------------------------|----------------------------------------------------------------|
| Female flowers in spring | F1           | 181774064                      | 155 ×                        | 69459442                                                       |
|                          | F2           | 317916206                      | 272 ×                        | 71219007                                                       |
|                          | F3           | 311296521                      | 226 ×                        | 69020079                                                       |
| Male flowers in spring   | M1           | 151320125                      | 129 ×                        | 89825685                                                       |
|                          | M2           | 136915437                      | 117 ×                        | 89680382                                                       |
|                          | M3           | 147989616                      | 140 ×                        | 89571835                                                       |
| Female flowers in summer | Fs1          | 112045989                      | 96 ×                         | 82178412                                                       |
|                          | Fs2          | 115728174                      | 99 ×                         | 83633781                                                       |
|                          | Fs3          | 128433938                      | 110 ×                        | 81300599                                                       |
| Male flowers in summer   | Ms1          | 117559902                      | 100 ×                        | 82668346                                                       |
|                          | Ms2          | 138246727                      | 118 ×                        | 83308163                                                       |
|                          | Ms3          | 135706771                      | 116 ×                        | 83277450                                                       |
| Female flowers in winter | Fw1          | 132537436                      | 113 ×                        | 78714906                                                       |
|                          | Fw2          | 170492502                      | 146 ×                        | 82359777                                                       |
| Male flowers in winter   | Mw1          | 146953101                      | 125 ×                        | 83508039                                                       |
|                          | Mw2          | 136659927                      | 117 ×                        | 82410448                                                       |
