# Supplementary material for: DNA methylome and transcriptome landscapes revealed differential characteristics of dioecious flowers in papaya
Source: PubMed Central journal article supplement (PMC7261803; doi:10.1038/s41438-020-0298-0), 2020-06-01
Supplement: 41438_2020_298_MOESM4_ESM.pdf [file 41438_2020_298_MOESM4_ESM.pdf]

**Supplementary Table 2** The average methylation ratios of flower samples

| Sequence contexts               | CpG       | CHG       | CHH       |
|---------------------------------|-----------|-----------|-----------|
| Sample                          |           |           |           |
| F-1 (female flowers in spring)  | 79.1549 % | 61.4239 % | 5.9817 %  |
| F-2 (female flowers in spring)  | 80.3338 % | 63.4217 % | 8.9348 %  |
| F-3 (female flowers in spring)  | 79.9694 % | 63.1497 % | 9.2060 %  |
| M-1 (male flowers in spring)    | 79.7965 % | 61.3563 % | 5.6666 %  |
| M-2 (male flowers in spring)    | 78.8467 % | 59.6708 % | 3.9060 %  |
| M-3 (male flowers in spring)    | 79.4604 % | 60.7333 % | 4.9475 %  |
| Fs-1 (female flowers in summer) | 81.6775 % | 63.4453 % | 6.0635 %  |
| Fs-2 (female flowers in summer) | 81.6313 % | 63.4238 % | 6.0972 %  |
| Fs-3 (female flowers in summer) | 81.7146 % | 63.6039 % | 6.2144 %  |
| Ms-1 (male flowers in summer)   | 81.4944 % | 63.429 %  | 6.4303 %  |
| Ms-2 (male flowers in summer)   | 81.4941 % | 63.5407 % | 6.7509 %  |
| Ms-3 (male flowers in summer)   | 81.4510 % | 63.4491 % | 6.5899 %  |
| Fw-1 (female flowers in winter) | 81.7120 % | 64.9993 % | 10.1820 % |
| Fw-2 (female flowers in winter) | 81.2076 % | 64.3152 % | 9.4026 %  |
| Mw-1 (male flowers in winter)   | 81.7541 % | 64.7106 % | 9.1560 %  |
| Mw-2 (male flowers in winter)   | 81.7844 % | 64.7188 % | 8.6955 %  |
