# Supplementary material for: DNA methylome and transcriptome landscapes revealed differential characteristics of dioecious flowers in papaya
Source: PubMed Central journal article supplement (PMC7261803; doi:10.1038/s41438-020-0298-0), 2020-06-01
Supplement: 41438_2020_298_MOESM6_ESM.pdf [file 41438_2020_298_MOESM6_ESM.pdf]

**Supplementary Table 4 Details of methylation related gene expression patterns changes in different comparisons**

| Gene groups                       | Gene sub-groups                     | Gene names    | Gene IDs in papaya genome | Fold Change of FPKM (log2 treated) |                 |                 |                |                |                |                |
|-----------------------------------|-------------------------------------|---------------|---------------------------|------------------------------------|-----------------|-----------------|----------------|----------------|----------------|----------------|
|                                   |                                     |               |                           | F(ref.) vs. M                      | Fs(ref.) vs. Ms | Fw(ref.) vs. Mw | F(ref.) vs. Fs | M(ref.) vs. Ms | F(ref.) vs. Fw | M(ref.) vs. Mw |
| Genes involved in DNA methylation | RNA-directed DNA methylation (A1)   | <i>CLSY2</i>  | evm.TU.supercontig_19.123 | 0.222903                           | 0.057999        | -0.144529       | 0.312257       | 0.147353       | -2.57368       | -2.94111       |
|                                   |                                     | <i>CLSY3</i>  | evm.TU.supercontig_76.2   | 0.162676                           | 0.422872        | -0.547956       | -0.485662      | -0.225465      | 2.44571        | 1.73508        |
|                                   |                                     | <i>SHH1a</i>  | evm.TU.supercontig_109.7  | 0.0511542                          | -0.0613928      | 0.329879        | -0.461107      | -0.573654      | -0.811019      | -0.532294      |
|                                   |                                     | <i>SHH1b</i>  | evm.TU.supercontig_109.8  | 0.0511542                          | -0.0613928      | 0.329879        | -0.461107      | -0.573654      | -0.811019      | -0.532294      |
|                                   |                                     | <i>RDR1a</i>  | evm.TU.supercontig_2.176  | 0.240332                           | 0.0755317       | 0.182465        | 0.910036       | 0.745236       | 0.0368228      | -0.0210443     |
|                                   |                                     | <i>RDR1b</i>  | evm.TU.supercontig_2.177  | 0.240332                           | 0.0755317       | 0.182465        | 0.910036       | 0.745236       | 0.0368228      | -0.0210443     |
|                                   |                                     | <i>RDR1c</i>  | evm.TU.supercontig_2.178  | 0.240332                           | 0.0755317       | 0.182465        | 0.910036       | 0.745236       | 0.0368228      | -0.0210443     |
|                                   |                                     | <i>RDR1d</i>  | evm.TU.supercontig_2.183  | 0.868921                           | -0.0550928      | -0.388036       | 1.34379        | 0.419775       | 2.26945        | 1.0125         |
|                                   |                                     | <i>RDR2</i>   | evm.TU.supercontig_124.30 | -0.127821                          | 0.00353407      | 0.347354        | 0.216032       | 0.347387       | -0.639947      | -0.164773      |
|                                   |                                     | <i>RDR6</i>   | evm.TU.supercontig_117.8  | -0.125738                          | -0.151846       | 0.270544        | 0.161978       | 0.13587        | -1.17944       | -0.783157      |
|                                   |                                     | <i>DCL1a</i>  | evm.TU.supercontig_57.73  | 0.0101511                          | 0.523963        | -1.1932         | -0.305402      | 0.20841        | -1.79797       | -3.00133       |
|                                   |                                     | <i>DCL1b</i>  | evm.TU.supercontig_57.74  | -0.215135                          | -0.0665651      | -1.21472        | -0.42876       | -0.28019       | 0.415174       | -0.584411      |
|                                   |                                     | <i>DCL2a</i>  | evm.TU.supercontig_123.44 | 0.00260521                         | 0.0699465       | -0.463426       | 0.0852424      | 0.152584       | 0.197756       | -0.268275      |
|                                   |                                     | <i>DCL2b</i>  | evm.TU.supercontig_123.45 | 0.00260521                         | 0.0699465       | -0.463426       | 0.0852424      | 0.152584       | 0.197756       | -0.268275      |
|                                   |                                     | <i>DCL2c</i>  | evm.TU.supercontig_123.46 | 0.662487                           | 0.305734        | -2.28542        | 0.985323       | 0.62857        | 0.469004       | -2.47891       |
|                                   |                                     | <i>DCL3a</i>  | evm.TU.supercontig_67.83  | -0.0911995                         | 0.000205171     | -0.662909       | 0.215699       | 0.307104       | 0.33157        | -0.240139      |
|                                   |                                     | <i>DCL3b</i>  | evm.TU.supercontig_67.84  | -0.0911995                         | 0.000205171     | -0.662909       | 0.215699       | 0.307104       | 0.33157        | -0.240139      |
|                                   |                                     | <i>DCL3c</i>  | evm.TU.supercontig_67.86  | -0.0911995                         | 0.000205171     | -0.662909       | 0.215699       | 0.307104       | 0.33157        | -0.240139      |
|                                   |                                     | <i>DCL3d</i>  | evm.TU.contig_40955       | -0.200059                          | 0.115332        | -1.02594        | 0.189449       | 0.50484        | 0.745542       | -0.0803384     |
|                                   |                                     | <i>DCL4a</i>  | evm.TU.supercontig_397.1  | -0.220791                          | -0.132428       | -1.17856        | -1.2395        | -1.15114       | -0.521723      | -1.47949       |
|                                   |                                     | <i>DCL4b</i>  | evm.TU.supercontig_397.3  | -0.220791                          | -0.132428       | -1.17856        | -1.2395        | -1.15114       | -0.521723      | -1.47949       |
|                                   |                                     | <i>DCL4c</i>  | evm.TU.supercontig_397.5  | -0.220791                          | -0.132428       | -1.17856        | -1.2395        | -1.15114       | -0.521723      | -1.47949       |
|                                   |                                     | <i>DCL4d</i>  | evm.TU.supercontig_46.92  | -0.0674471                         | -0.973998       | -2.28397        | 0.000208075    | -0.906343      | -0.616515      | -2.83304       |
|                                   |                                     | <i>DCL4e</i>  | evm.TU.supercontig_46.94  | -0.0674471                         | -0.973998       | -2.28397        | 0.000208075    | -0.906343      | -0.616515      | -2.83304       |
|                                   |                                     | <i>DCL4f</i>  | evm.TU.contig_36105       | -0.238015                          | 0.307108        | -1.5688         | -0.382004      | 0.16312        | -0.567196      | -1.89798       |
|                                   |                                     | <i>AGO1a</i>  | evm.TU.supercontig_47.31  | -0.017164                          | 0.185112        | -0.304895       | -0.178971      | 0.0233059      | -0.522469      | -0.8102        |
|                                   |                                     | <i>AGO1b</i>  | evm.TU.supercontig_1673.2 | -0.105708                          | 0.332502        | -0.0162811      | -3.45722       | -3.01901       | -4.1991        | -4.10967       |
|                                   |                                     | <i>AGO1c</i>  | evm.TU.contig_46512       | -0.0825227                         | 0.0593581       | -0.100069       | -0.28112       | -0.139239      | -0.877655      | -0.895201      |
|                                   |                                     | <i>AGO2a</i>  | evm.TU.contig_41691       | 0.561495                           | -0.64171        | -0.288094       | 2.99853        | 1.79532        | 4.79075        | 3.94117        |
|                                   |                                     | <i>AGO2b</i>  | evm.TU.supercontig_135.40 | 0.138163                           | 0.266554        | -0.168588       | -0.241519      | -0.113127      | -0.247947      | -0.554697      |
|                                   |                                     | <i>AGO4</i>   | evm.TU.supercontig_26.59  | -0.146807                          | 0.194488        | -0.133234       | 0.168624       | 0.509919       | -1.02817       | -1.0146        |
|                                   |                                     | <i>AGO7</i>   | evm.TU.supercontig_1.68   | 0.290224                           | 0.673197        | 0.602845        | -0.526087      | -0.143114      | -1.61368       | -1.30105       |
|                                   |                                     | <i>AGO9</i>   | evm.TU.supercontig_600.1  | -0.120319                          | 0.157126        | -0.0761734      | -0.441019      | -0.163574      | -1.37713       | -1.33298       |
|                                   |                                     | <i>AGO10a</i> | evm.TU.supercontig_44.130 | 0.0658198                          | 0.0663537       | 0.109275        | 0.283885       | 0.284419       | -1.33383       | -1.29037       |
|                                   |                                     | <i>AGO10b</i> | evm.TU.supercontig_75.90  | -0.0795312                         | 0.209986        | -0.0440624      | -0.477173      | -0.187656      | -2.21216       | -2.17669       |
|                                   |                                     | <i>DRM1</i>   | evm.TU.supercontig_373.3  | -0.459297                          | -0.291194       | 0.0749376       | 1.261          | 1.4291         | -1.27112       | -0.736884      |
|                                   |                                     | <i>DRM2</i>   | evm.TU.supercontig_470.2  | 0.11496                            | 0.167496        | -0.0714336      | 0.196904       | 0.24944        | 0.707488       | 0.521094       |
|                                   |                                     | <i>DRM3a</i>  | evm.TU.supercontig_146.49 | -0.253028                          | 0.191413        | -0.650644       | -0.175728      | 0.268713       | -1.77891       | -2.17652       |
|                                   |                                     | <i>DRM3b</i>  | evm.TU.supercontig_146.50 | 0.178506                           | 0.0364564       | 0.0949943       | 1.10119        | 0.959144       | 0.409859       | 0.326348       |
|                                   |                                     | <i>IDN1</i>   | evm.TU.supercontig_39.5   | -0.12703                           | -0.508418       | 0.0935065       | 0.156139       | -0.225249      | -1.80125       | -1.58072       |
|                                   |                                     | <i>IDN2</i>   | evm.TU.supercontig_1.418  | -0.138454                          | -0.191104       | 0.517152        | 0.745404       | 0.692755       | -0.702138      | -0.0465318     |
|                                   |                                     | <i>IDP1</i>   | evm.TU.supercontig_10.88  | 0.0851183                          | -0.0135877      | 0.479807        | 0.254687       | 0.155981       | -1.07871       | -0.684022      |
| <i>RRP6L1</i>                     | evm.TU.supercontig_87.78            | -0.305657     | 0.0294954                 | -0.0337534                         | 0.265048        | 0.6002          | -0.524799      | -0.252895      |                |                |
|                                   | Maintenance of DNA methylation (A2) | <i>MET1</i>   | evm.TU.supercontig_37.192 | 0.0147706                          | 0.0802334       | 0.181334        | -0.940436      | -0.874973      | -2.18024       | -2.01367       |
|                                   |                                     | <i>CMT2a</i>  | evm.TU.contig_46763       | -0.480434                          | 1.04118         | 0.539795        | 0.22783        | 1.74945        | -3.33891       | -2.31868       |

|                   |      |              |                           |            |            |            |            |             |            |           |
|-------------------|------|--------------|---------------------------|------------|------------|------------|------------|-------------|------------|-----------|
|                   | (A2) | <i>CMT2b</i> | evm.TU.supercontig_133.1  | 0.00291933 | 0.0929509  | 0.225786   | 0.299356   | 0.389388    | -2.8523    | -2.62944  |
|                   | (A2) | <i>CMT3c</i> | evm.TU.supercontig_27.168 | -0.26165   | -0.269973  | 3.22585    | -0.905841  | -0.914163   | -7.41744   | -3.92994  |
|                   | (A2) | <i>CMT3d</i> | evm.TU.supercontig_48.151 | 0.0163085  | -0.305546  | -0.0169025 | 0.730725   | 0.40887     | -0.0794022 | -0.112613 |
|                   | (A2) | <i>DRM2</i>  | evm.TU.supercontig_470.2  | 0.11496    | 0.167496   | -0.0714336 | 0.196904   | 0.24944     | 0.707488   | 0.521094  |
|                   | (A2) | <i>SUVH4</i> | evm.TU.supercontig_70.67  | -0.333211  | -0.116595  | 0.567708   | 0.311237   | 0.527853    | -1.98852   | -1.0876   |
|                   | (A2) | <i>SUVH6</i> | evm.TU.contig_35939       | -0.0822372 | 0.125532   | -0.509828  | -0.581063  | -0.373293   | -0.0405522 | -0.468143 |
| DNA Demethylation | (A3) | <i>ROS1</i>  | evm.TU.supercontig_5.80   | 0.14876    | 0.186602   | -0.121938  | 0.223845   | 0.261687    | -1.26863   | -1.53933  |
|                   | (A3) | <i>DME</i>   | evm.TU.supercontig_128.52 | -0.146997  | -0.34125   | -1.70739   | -1.28743   | -1.48169    | -1.27444   | -2.83483  |
|                   | (A3) | <i>DME</i>   | evm.TU.supercontig_5.81   | -0.262736  | 0.300617   | -0.37133   | -1.01632   | -0.452968   | -1.78111   | -1.88971  |
|                   | (A3) | <i>ZDP</i>   | evm.TU.supercontig_77.9   | -0.122353  | -0.0604196 | 0.562896   | -0.0688937 | -0.00696067 | -1.00298   | -0.317734 |
|                   | (A3) | <i>APE</i>   | evm.TU.supercontig_6.256  | -0.119182  | 0.0212076  | -0.212314  | -0.488455  | -0.348066   | 0.495579   | 0.402446  |
|                   | (A3) | <i>LIG1a</i> | evm.TU.supercontig_1.10   | 0.318382   | 0.473684   | -0.630409  | -0.601462  | -0.44616    | 0.156836   | -0.791955 |
|                   | (A3) | <i>LIG1b</i> | evm.TU.supercontig_1.8    | -0.152254  | 0.358898   | -0.495869  | -1.03464   | -0.523488   | -1.46475   | -1.80836  |
|                   | (A3) | <i>IDM1</i>  | evm.TU.supercontig_97.95  | -0.158739  | -0.0665913 | -0.698226  | -0.509878  | -0.41773    | -0.498697  | -1.03818  |
|                   | (A3) | <i>HDP1</i>  | evm.TU.supercontig_29.100 | -0.224091  | -0.058818  | -0.220191  | 0.507515   | 0.672789    | 0.59378    | 0.59768   |
|                   | (A3) | <i>HDP2</i>  | evm.TU.supercontig_148.5  | 0.112471   | -0.0153484 | 0.249771   | 0.522036   | 0.394216    | 0.451373   | 0.588672  |
|                   | (A3) | <i>IDM2</i>  | evm.TU.supercontig_48.29  | 0.0312353  | 0.273953   | -0.145973  | -0.947343  | -0.704625   | 0.824086   | 0.646878  |

|                                        |                                    |                           |              |                           |                           |             |            |            |             |           |           |            |
|----------------------------------------|------------------------------------|---------------------------|--------------|---------------------------|---------------------------|-------------|------------|------------|-------------|-----------|-----------|------------|
| Genes involved in histone modification | Histone Chaperone HIRA             | (B1)                      | <i>HIRAa</i> | evm.TU.contig_36505.3     | -0.0692791                | 0.196046    | -0.159362  | -0.318873  | -0.053548   | 1.0282    | 0.938122  |            |
|                                        |                                    | (B1)                      | <i>HIRAb</i> | evm.TU.supercontig_1624.1 | -0.160893                 | 0.0363554   | -0.499724  | -0.72444   | -0.527192   | -0.226323 | -0.565154 |            |
| Histone Monoubiquitination 1- like     | Histone Monoubiquitination 1- like | (B2)                      | <i>HUB1a</i> | evm.TU.supercontig_101.40 | 0.117996                  | 0.0591987   | -0.831151  | -0.0174307 | -0.0762282  | 0.801882  | -0.147266 |            |
|                                        |                                    | (B2)                      | <i>HUB1b</i> | evm.TU.supercontig_101.41 | 0.117996                  | 0.0591987   | -0.831151  | -0.0174307 | -0.0762282  | 0.801882  | -0.147266 |            |
|                                        |                                    | (B2)                      | <i>HUB2a</i> | evm.TU.supercontig_119.82 | -0.330648                 | -0.437073   | -0.0976753 | 1.431      | 1.32458     | 0.783184  | 1.01616   |            |
|                                        |                                    | (B2)                      | <i>HUB2b</i> | evm.TU.supercontig_119.83 | -0.330648                 | -0.437073   | -0.0976753 | 1.431      | 1.32458     | 0.783184  | 1.01616   |            |
|                                        | Histone deacetylase                | Histone deacetylase       | (B3)         | <i>HDA1a</i>              | evm.TU.contig_48086       | 0.0901894   | 0.243667   | -0.496475  | -0.891723   | -0.738245 | -0.12787  | -0.714535  |
|                                        |                                    |                           | (B3)         | <i>HDA1b</i>              | evm.TU.supercontig_63.33  | -0.50181    | 0.184288   | -1.20415   | -2.76374    | -2.07764  | -0.713774 | -1.41612   |
|                                        |                                    |                           | (B3)         | <i>HDA1c</i>              | evm.TU.supercontig_63.37  | -0.50181    | 0.184288   | -1.20415   | -2.76374    | -2.07764  | -0.713774 | -1.41612   |
|                                        |                                    |                           | (B3)         | <i>HDA2</i>               | evm.TU.supercontig_7.166  | -0.0753456  | -0.0627526 | 0.625826   | 0.644375    | 0.656968  | 1.13321   | 1.83438    |
|                                        |                                    |                           | (B3)         | <i>HD2Ca</i>              | evm.TU.supercontig_47.60  | -0.272008   | -0.128737  | -0.172456  | 0.219675    | 0.362946  | 0.787273  | 0.886825   |
|                                        |                                    |                           | (B3)         | <i>HD2Cb</i>              | evm.TU.supercontig_5.85   | -0.0769227  | -0.204628  | 0.119981   | 0.385867    | 0.258162  | 0.542151  | 0.739055   |
|                                        |                                    |                           | (B3)         | <i>HD2Cc</i>              | evm.TU.supercontig_599.1  | 0.0301759   | -0.0840347 | 0.0664008  | -0.245299   | -0.35951  | -0.464154 | -0.427929  |
|                                        |                                    |                           | (B3)         | <i>HDA5a</i>              | evm.TU.supercontig_140.1  | 0.108016    | 0.106548   | -0.502243  | 0.390673    | 0.389205  | 1.73896   | 1.12871    |
|                                        |                                    |                           | (B3)         | <i>HDA5b</i>              | evm.TU.supercontig_140.11 | 0.342949    | 0.275768   | -0.267244  | -0.597706   | -0.664887 | 0.984726  | 0.374534   |
|                                        |                                    |                           | (B3)         | <i>HDA5c</i>              | evm.TU.supercontig_140.13 | -0.00627715 | 0.0460774  | 0.255876   | -0.384465   | -0.33211  | 1.89642   | 2.15857    |
|                                        |                                    |                           | (B3)         | <i>HDA5d</i>              | evm.TU.supercontig_67.15  | 1.55995     | -1.31137   | -1.0702    | 2.90902     | 0.0377005 | 2.31176   | -0.318395  |
|                                        |                                    |                           | (B3)         | <i>HDA5e</i>              | evm.TU.supercontig_94.49  | 0.155486    | -0.0284847 | 0.387543   | -0.325771   | -0.509742 | -0.249833 | -0.0177759 |
|                                        |                                    |                           | (B3)         | <i>HDA5f</i>              | evm.TU.supercontig_94.50  | 0.155486    | -0.0284847 | 0.387543   | -0.325771   | -0.509742 | -0.249833 | -0.0177759 |
| (B3)                                   | <i>HDA5g</i>                       | evm.TU.supercontig_99.2   | 0.383766     | 0.97257                   | -0.0127759                | 0.0588738   | 0.647678   | 1.88706    | 1.49052     |           |           |            |
| (B3)                                   | <i>HDA6</i>                        | evm.TU.supercontig_110.13 | -0.321186    | -0.131275                 | 0.246349                  | 0.627622    | 0.817533   | 0.0886111  | 0.656146    |           |           |            |
| (B3)                                   | <i>HDA8</i>                        | evm.TU.supercontig_754.5  | -0.132133    | -0.31585                  | -0.694976                 | 1.81123     | 1.62751    | 0.61142    | 0.0485771   |           |           |            |
| (B3)                                   | <i>HDA9a</i>                       | evm.TU.supercontig_31.89  | 0.160058     | -0.0492313                | -0.47042                  | 0.47748     | 0.26819    | 0.889219   | 0.25874     |           |           |            |
| (B3)                                   | <i>HDA9b</i>                       | evm.TU.supercontig_509.2  | -0.168405    | -0.184423                 | -0.663028                 | -0.587666   | -0.603685  | -0.373168  | -0.867792   |           |           |            |
| (B3)                                   | <i>HDA14</i>                       | evm.TU.supercontig_42.168 | -0.130452    | 0.0168971                 | -1.05996                  | 0.516852    | 0.664201   | 0.297937   | -0.631568   |           |           |            |
| (B3)                                   | <i>HDA15</i>                       | evm.TU.supercontig_13.45  | -0.333876    | -0.288364                 | 0.169873                  | 0.427881    | 0.473394   | -0.506118  | -0.00236957 |           |           |            |
| (B3)                                   | <i>HDA18a</i>                      | evm.TU.contig_36738       | 0.284623     | -0.0561281                | -1.01543                  | -0.313615   | -0.654366  | 1.53502    | 0.234972    |           |           |            |
| (B3)                                   | <i>HDA18b</i>                      | evm.TU.supercontig_67.16  | -0.497077    | 0.16392                   | -0.352709                 | -0.230863   | 0.430134   | 0.78923    | 0.933598    |           |           |            |
| (B3)                                   | <i>HDA18c</i>                      | evm.TU.supercontig_99.1   | 0.383766     | 0.97257                   | -0.0127759                | 0.0588738   | 0.647678   | 1.88706    | 1.49052     |           |           |            |
| (B3)                                   | <i>HDA18d</i>                      | evm.TU.supercontig_99.3   | 0.383766     | 0.97257                   | -0.0127759                | 0.0588738   | 0.647678   | 1.88706    | 1.49052     |           |           |            |

|                           |                          |              |                           |                           |             |            |           |           |            |             |           |
|---------------------------|--------------------------|--------------|---------------------------|---------------------------|-------------|------------|-----------|-----------|------------|-------------|-----------|
| Histone acetyltransferase | (B4)                     | <i>HAC1a</i> | evm.TU.supercontig_10.17  | -0.173295                 | 0.149393    | -1.37163   | -0.227923 | 0.0947653 | 0.240304   | -0.958033   |           |
|                           | (B4)                     | <i>HAC1b</i> | evm.TU.supercontig_818.3  | -0.376582                 | -0.255035   | -1.17798   | 1.02619   | 1.14774   | 2.50133    | 1.69993     |           |
|                           | (B4)                     | <i>HAC1c</i> | evm.TU.supercontig_179.37 | -0.377152                 | -0.383332   | -1.23016   | 0.748553  | 0.742372  | 1.75525    | 0.902244    |           |
|                           | (B4)                     | <i>HAG1</i>  | evm.TU.supercontig_52.102 | -0.433676                 | -0.0428055  | -0.530901  | 0.415136  | 0.806006  | -0.154445  | -0.25167    |           |
|                           | (B4)                     | <i>HAG2</i>  | evm.TU.supercontig_32.101 | -0.0679572                | 0.0226659   | -0.0300333 | -0.953174 | -0.86255  | -0.0236615 | 0.0142623   |           |
|                           | (B4)                     | <i>HAM1</i>  | evm.TU.supercontig_42.141 | 0.0820798                 | -0.00748923 | 0.0262313  | 0.301677  | 0.212108  | 0.179067   | 0.123218    |           |
|                           | (B4)                     | <i>HAM2</i>  | evm.TU.supercontig_42.140 | 0.0820798                 | -0.00748923 | 0.0262313  | 0.301677  | 0.212108  | 0.179067   | 0.123218    |           |
|                           | SET-domain group protein | (B5)         | <i>SDG7</i>               | evm.TU.supercontig_9.234  | -0.0454953  | -0.275642  | -0.656991 | 0.329467  | 0.0993201  | 0.473281    | -0.138215 |
|                           |                          | (B5)         | <i>SDG8</i>               | evm.TU.supercontig_26.315 | -0.0133014  | 0.0736446  | -1.02415  | -0.499482 | -0.412536  | -0.0236889  | -1.03454  |
|                           |                          | (B5)         | <i>SDG26</i>              | evm.TU.supercontig_49.86  | 0.0236377   | -0.0787096 | -0.295975 | 0.0829444 | -0.019403  | -0.00149312 | -0.321106 |
|                           |                          | (B5)         | <i>SDG36</i>              | evm.TU.supercontig_8.235  | 0.18054     | 0.287485   | -1.31133  | 0.246541  | 0.353486   | 1.14921     | -0.342661 |

|                                        |                      |                     |                           |            |             |            |           |            |             |           |
|----------------------------------------|----------------------|---------------------|---------------------------|------------|-------------|------------|-----------|------------|-------------|-----------|
| Genes involved in chromatin remodeling | Chromatin remodeling | <i>IDN1</i>         | evm.TU.supercontig_39.5   | -0.12703   | -0.508418   | 0.0935065  | 0.156139  | -0.225249  | -1.80125    | -1.58072  |
|                                        |                      | <i>IDP1</i>         | evm.TU.supercontig_10.88  | 0.0851183  | -0.0135877  | 0.479807   | 0.254687  | 0.155981   | -1.07871    | -0.684022 |
|                                        |                      | <i>FDM4a</i>        | evm.TU.supercontig_81.135 | -0.325537  | -0.409065   | -0.0563799 | 1.21991   | 1.13638    | -0.0918898  | 0.177267  |
|                                        |                      | <i>FDM4b</i>        | evm.TU.supercontig_81.136 | -0.325537  | -0.409065   | -0.0563799 | 1.21991   | 1.13638    | -0.0918898  | 0.177267  |
|                                        |                      | <i>SWI3Aa</i>       | evm.TU.contig_40216       | 0.160966   | 0.102649    | 0.165329   | 0.151652  | 0.0933356  | 0.415035    | 0.419398  |
|                                        |                      | <i>SWI3Ab</i>       | evm.TU.supercontig_4.159  | 0.00212063 | 0.236042    | -0.557991  | 0.0320351 | 0.265957   | 1.27521     | 0.715103  |
|                                        |                      | <i>SWI3Ac</i>       | evm.TU.supercontig_4.161  | 0.00212063 | 0.236042    | -0.557991  | 0.0320351 | 0.265957   | 1.27521     | 0.715103  |
|                                        |                      | <i>SWI3B</i>        | evm.TU.supercontig_26.13  | 0.042149   | 0.0494761   | -0.104629  | -0.222038 | -0.214711  | 0.495052    | 0.348273  |
|                                        |                      | <i>SWI3Ca</i>       | evm.TU.supercontig_64.124 | 0.0305236  | -0.0769048  | 0.190936   | 0.624531  | 0.517102   | 0.847536    | 1.00795   |
|                                        |                      | <i>SWI3Cb</i>       | evm.TU.supercontig_64.126 | 0.0305236  | -0.0769048  | 0.190936   | 0.624531  | 0.517102   | 0.847536    | 1.00795   |
|                                        |                      | <i>SWI3Cc</i>       | evm.TU.supercontig_64.127 | 0.0305236  | -0.0769048  | 0.190936   | 0.624531  | 0.517102   | 0.847536    | 1.00795   |
|                                        |                      | <i>SWI3D</i>        | evm.TU.supercontig_62.137 | -0.145152  | 0.36808     | -0.495699  | -0.421198 | 0.0920347  | -0.422006   | -0.772553 |
|                                        |                      | <i>SNF2-like1</i>   | evm.TU.contig_38871       | -0.0773177 | -0.00904353 | -1.30891   | 0.1144    | 0.182674   | 0.66038     | -0.57121  |
|                                        |                      | <i>SNF2-like2</i>   | evm.TU.supercontig_221.20 | -0.0612522 | -0.0981509  | -0.55319   | 0.352368  | 0.315469   | 1.619       | 1.12706   |
|                                        |                      | <i>SNF2-like3</i>   | evm.TU.contig_36046       | 0.1074     | 0.3474      | 0.2168     | 0.1156    | 0.2136     | 0.2136      | 0.3146    |
|                                        |                      | <i>SNF2-like4</i>   | evm.TU.contig_38871       | -0.0773177 | -0.00904353 | -1.30891   | 0.1144    | 0.182674   | 0.66038     | -0.57121  |
|                                        |                      | <i>SNF2-like5</i>   | evm.TU.contig_44154       | 0.00651491 | 0.0129277   | -0.818084  | 0.39935   | 0.405763   | 1.41668     | 0.592081  |
|                                        |                      | <i>SNF2-like6</i>   | evm.TU.supercontig_221.20 | -0.0612522 | -0.0981509  | -0.55319   | 0.352368  | 0.315469   | 1.619       | 1.12706   |
|                                        |                      | <i>SNF2-like7</i>   | evm.TU.supercontig_2800.1 | 0.617066   | -0.366804   | -0.307794  | 1.79626   | 0.812388   | 1.94994     | 1.02508   |
|                                        |                      | <i>SNF2-like8</i>   | evm.TU.supercontig_94.1   | -0.0429711 | -0.0706649  | -0.372264  | 0.355906  | 0.328212   | -0.0654889  | -0.394781 |
|                                        |                      | <i>SNF2-like9</i>   | evm.TU.supercontig_997.1  | -0.0333021 | -0.0666798  | -1.52599   | -0.022311 | -0.0556887 | 0.431486    | -1.06121  |
|                                        |                      | <i>INO80</i>        | evm.TU.supercontig_182.16 | -0.0264075 | -0.0488095  | -0.166547  | 0.265503  | 0.243101   | -0.00201199 | -0.142151 |
|                                        |                      | <i>ARP6</i>         | evm.TU.supercontig_46.24  | -0.165939  | -0.120253   | -0.13283   | 0.702787  | 0.748473   | 0.263365    | 0.296474  |
|                                        |                      | <i>CHC1a</i>        | evm.TU.supercontig_13.130 | 0.114426   | 0.0653091   | -0.0437897 | -0.230237 | -0.279354  | 0.52085     | 0.362635  |
|                                        |                      | <i>CHC1b</i>        | evm.TU.supercontig_171.24 | -0.0444239 | 0.0138418   | -0.483925  | 0.44677   | 0.505036   | 1.02532     | 0.585822  |
|                                        |                      | <i>HR(B2)</i>       | evm.TU.supercontig_127.15 | -0.143556  | 0.00791456  | -0.191422  | -0.712    | -0.56053   | -0.447682   | -0.495548 |
|                                        |                      | <i>CHR2/BRAHMAa</i> | evm.TU.supercontig_11.23  | -0.37175   | -0.514798   | -0.550304  | 0.0138174 | -0.12923   | -2.1412     | -2.31976  |
|                                        |                      | <i>CHR2/BRAHMAb</i> | evm.TU.supercontig_11.24  | -0.547841  | -0.0946829  | -0.563702  | 0.504899  | 0.958058   | -0.135614   | -0.151475 |
|                                        |                      | <i>CHR3/SYDa</i>    | evm.TU.supercontig_16.99  | -0.115753  | 0.0197376   | -0.705347  | -0.168412 | -0.0329214 | 0.0297712   | -0.559823 |
|                                        |                      | <i>CHR3/SYDb</i>    | evm.TU.supercontig_16.94  | -0.233292  | -0.0965124  | 0.00317027 | -0.526783 | -0.390004  | 0.0632281   | 0.29969   |
|                                        |                      | <i>CHR3/SYDc</i>    | evm.TU.supercontig_16.100 | -0.233292  | -0.0965124  | 0.00317027 | -0.526783 | -0.390004  | 0.0632281   | 0.29969   |
|                                        |                      | <i>CHR3/SYDd</i>    | evm.TU.supercontig_16.103 | -0.233292  | -0.0965124  | 0.00317027 | -0.526783 | -0.390004  | 0.0632281   | 0.29969   |
|                                        |                      | <i>CHR4/PKR1</i>    | evm.TU.supercontig_30.142 | -0.181953  | -0.029815   | -0.855681  | -0.429284 | -0.277146  | -0.0295481  | -0.703276 |
|                                        |                      | <i>CHR5a</i>        | evm.TU.contig_34800       | 0          | 0           | 0          | 0         | 0          | 0           | 0         |
|                                        |                      | <i>CHR5b</i>        | evm.TU.contig_36207       | 0.0692654  | -0.018602   | -1.56511   | -0.431208 | -0.519076  | 0.308321    | -1.32605  |
|                                        |                      | <i>CHR5c</i>        | evm.TU.contig_37405       | -0.0705122 | 0.09131     | -1.99177   | -0.650464 | -0.488642  | -0.460642   | -2.3819   |

|                          |                           |            |             |             |             |             |             |              |
|--------------------------|---------------------------|------------|-------------|-------------|-------------|-------------|-------------|--------------|
| <i>CHR5d</i>             | evm.TU.supercontig_84.18  | -0.0598339 | 0.138014    | -1.92293    | -1.12082    | -0.922969   | -1.40523    | -3.26833     |
| <i>CHR5e</i>             | evm.TU.supercontig_892.1  | -0.038926  | -0.197975   | -0.714114   | -0.237326   | -0.396375   | 0.990946    | 0.315758     |
| <i>CHR6/PICKLE</i>       | evm.TU.supercontig_127.15 | -0.143556  | 0.00791456  | -0.191422   | -0.712      | -0.56053    | -0.447682   | -0.495548    |
| <i>CHR8</i>              | evm.TU.supercontig_165.16 | 0.210787   | -0.124492   | -0.586915   | 0.662343    | 0.327064    | 1.98338     | 1.18568      |
| <i>CHR9</i>              | evm.TU.supercontig_83.60  | 0.0190018  | 0.229193    | -0.862049   | 0.503015    | 0.713206    | 0.878914    | -0.00213749  |
| <i>CHR11</i>             | evm.TU.supercontig_16.129 | 0.118406   | 0.114274    | 0.130151    | -0.0269921  | -0.0311238  | 0.489266    | 0.501011     |
| <i>CHR12a</i>            | evm.TU.supercontig_1278.1 | -0.116321  | -0.249236   | -0.0692929  | 0.693914    | 0.561       | 0.80413     | 0.851159     |
| <i>CHR12b</i>            | evm.TU.contig_45714       | -0.33925   | -0.086244   | -0.981142   | 0.142707    | 0.395713    | -1.09676    | -1.73865     |
| <i>CHR13/PIE1/SRCAPa</i> | evm.TU.contig_33695       | -0.495237  | 0.147611    | -1.48528    | -0.464122   | 0.178726    | -1.61096    | -2.601       |
| <i>CHR13/PIE1/SRCAPb</i> | evm.TU.contig_39138       | -0.460475  | 1.73176     | -2.89535    | -1.33401    | 0.858224    | -0.867715   | -3.30259     |
| <i>CHR13/PIE1/SRCAPc</i> | evm.TU.supercontig_34.19  | -0.28412   | -0.0331593  | -0.797035   | 0.176979    | 0.42794     | 0.201507    | -0.311408    |
| <i>CHR13/PIE1/SRCAPd</i> | evm.TU.supercontig_34.20  | -0.28412   | -0.0331593  | -0.797035   | 0.176979    | 0.42794     | 0.201507    | -0.311408    |
| <i>CHR18a</i>            | evm.TU.supercontig_146.11 | -0.131142  | -0.159268   | -0.509333   | 0.608791    | 0.580666    | -0.0825961  | -0.460787    |
| <i>CHR18b</i>            | evm.TU.supercontig_146.12 | -0.131142  | -0.159268   | -0.509333   | 0.608791    | 0.580666    | -0.0825961  | -0.460787    |
| <i>CHR19</i>             | evm.TU.contig_26556.2     | -0.0789214 | -0.0389437  | -0.699851   | -0.570285   | -0.530307   | -0.0385973  | -0.659527    |
| <i>CHR24a</i>            | evm.TU.contig_40991       | -0.110076  | -0.103686   | -0.649151   | -1.29081    | -1.28442    | -4.03701    | -4.57609     |
| <i>CHR24b</i>            | evm.TU.supercontig_1639.3 | -0.113816  | -0.566615   | -0.331423   | -0.590584   | -1.04338    | -2.26481    | -2.48242     |
| <i>CHR31/CLSY3</i>       | evm.TU.supercontig_76.2   | 0.162676   | 0.422872    | -0.547956   | -0.485662   | -0.225465   | 2.44571     | 1.73508      |
| <i>CHR35/DMS1/DRD1</i>   | evm.TU.supercontig_1026.2 | -0.237272  | 0.181321    | -1.14466    | -0.61858    | -0.199987   | 0.93868     | 0.0312969    |
| <i>CHR42/CLSY2a</i>      | evm.TU.supercontig_19.122 | 0.222903   | 0.057999    | -0.144529   | 0.312257    | 0.147353    | -2.57368    | -2.94111     |
| <i>CHR42/CLSY2b</i>      | evm.TU.supercontig_19.123 | 0.222903   | 0.057999    | -0.144529   | 0.312257    | 0.147353    | -2.57368    | -2.94111     |
| <i>CHR-like1</i>         | evm.TU.supercontig_132.8  | -0.273388  | -0.261747   | 0.0764495   | 0.502865    | 0.514505    | -0.275693   | 0.0741443    |
| <i>CHR-like2</i>         | evm.TU.supercontig_152.54 | -0.191894  | -0.503098   | -0.0893474  | 1.09629     | 0.785085    | -0.61397    | -0.511424    |
| <i>CHR-like3</i>         | evm.TU.supercontig_1026.2 | -0.237272  | 0.181321    | -1.14466    | -0.61858    | -0.199987   | 0.93868     | 0.0312969    |
| <i>MOM1a</i>             | evm.TU.supercontig_311.2  | -0.102047  | -0.0281104  | -0.587811   | 0.0451466   | 0.119084    | 0.193031    | -0.292733    |
| <i>MOM1b</i>             | evm.TU.supercontig_311.4  | -0.102047  | -0.0281104  | -0.587811   | 0.0451466   | 0.119084    | 0.193031    | -0.292733    |
| <i>IBM1</i>              | evm.TU.supercontig_707.1  | -0.222791  | -0.0730116  | -0.361288   | -0.700303   | -0.550524   | -0.744736   | -0.883234    |
| <i>SYN4 in SDR</i>       | CpXY8                     | 0.48082397 | 1.577373408 | 0.073752298 | -1.23468329 | 0.091471235 | -0.13813385 | -0.315600437 |
| <i>MBD9 in SDR</i>       | CpXY20                    | -0.822931  | -1.14172    | -2.38812    | 0.374874    | -0.616345   | 0.0560815   | -2.18153     |
