# Supplementary material for: DNA methylome and transcriptome landscapes revealed differential characteristics of dioecious flowers in papaya
Source: PubMed Central journal article supplement (PMC7261803; doi:10.1038/s41438-020-0298-0), 2020-06-01
Supplement: 41438_2020_298_MOESM7_ESM.pdf [file 41438_2020_298_MOESM7_ESM.pdf]

**Supplementary Table 5. The expression levels of 11 sex-associated DEGs involved in phytohormone signal transduction**

|                      | Gene names | Gene IDs       | Homologous genes<br>in <i>Arabidopsis</i> | Expression levels of samples (FKPM) |         |         |         |         |         |         |
|----------------------|------------|----------------|-------------------------------------------|-------------------------------------|---------|---------|---------|---------|---------|---------|
|                      |            |                |                                           | F                                   | M       | Fs      | Ms      | Fw      | Mw      |         |
| Auxin signaling:     | AUX        | <i>CpAUX1</i>  | evm.TU.supercontig_1125.1                 | AT2G38120 ( <i>AtAUX1</i> )         | 23.7948 | 46.1924 | 20.8324 | 37.2311 | 3.76457 | 32.3549 |
|                      | TIR/AFB    | <i>CpTIR1</i>  | evm.TU.supercontig_27.130                 | AT3G62980 ( <i>AtTIR1</i> )         | 60.3436 | 85.5193 | 54.3516 | 78.7706 | 12.915  | 31.9012 |
|                      | ARF5       | <i>CpARF5</i>  | evm.TU.supercontig_26.24                  | AT1G19850 ( <i>AtARF5</i> )         | 215.989 | 321.318 | 204.633 | 382.788 | 40.575  | 74.4848 |
|                      | IAA4       | <i>CpIAA4</i>  | evm.TU.supercontig_58.36                  | AT5G43700 ( <i>AtIAA4</i> )         | 42.4561 | 96.0638 | 45.5219 | 73.4007 | 19.7624 | 263.782 |
|                      | IAA16      | <i>CpIAA16</i> | evm.TU.supercontig_23.159                 | AT3G04730 ( <i>AtIAA16</i> )        | 10.4961 | 21.8751 | 11.0651 | 31.9072 | 14.4097 | 199.08  |
| Cytokinin signaling: | AHP1       | <i>CpAHP1</i>  | evm.TU.supercontig_84.120                 | AT3G21510 ( <i>AtAHP1</i> )         | 90.7504 | 12.8406 | 162.069 | 10.4044 | 161.647 | 31.5317 |
|                      | ARR4       | <i>CpARR4</i>  | evm.TU.supercontig_5.328                  | AT1G10470 ( <i>AtARR4</i> )         | 31.9291 | 19.0782 | 48.1832 | 28.48   | 67.1488 | 39.7917 |
|                      | ARR5       | <i>CpARR5</i>  | evm.TU.supercontig_35.27                  | AT3G48100 ( <i>AtARR5</i> )         | 91.692  | 39.4026 | 72.5142 | 31.9628 | 215.258 | 62.5166 |
| ABA signaling:       | HAI2       | <i>CpHAI2</i>  | evm.TU.supercontig_81.90                  | AT1G07430 ( <i>AtHAI2</i> )         | 246.229 | 101.681 | 636.421 | 234.848 | 491.063 | 57.9741 |
|                      | SNRK2      | <i>CpSnRK2</i> | evm.TU.supercontig_36.167                 | AT1G78290 ( <i>AtSNRK2.8</i> )      | 26.0302 | 15.0888 | 30.0506 | 19.0755 | 47.5324 | 21.5901 |
| Ethyene signaling:   | EIN3       | <i>CpEIN3</i>  | evm.TU.supercontig_54.30                  | AT3G20770 ( <i>AtEIN3</i> )         | 24.4558 | 10.8401 | 55.9213 | 27.0891 | 70.3478 | 30.976  |
