# Supplementary material for: DNA methylome and transcriptome landscapes revealed differential characteristics of dioecious flowers in papaya
Source: PubMed Central journal article supplement (PMC7261803; doi:10.1038/s41438-020-0298-0), 2020-06-01
Supplement: 41438_2020_298_MOESM8_ESM.pdf [file 41438_2020_298_MOESM8_ESM.pdf]

**Supplementary Table 6. Ten sex-associated genes harboring CsDMCs**

| 10 sex-associated genes harboring CsDMCs    | CsDMCs location<br>(contig, position) | Gene regions where<br>containing CsDMCs | samples<br>comparing to female ones |
|---------------------------------------------|---------------------------------------|-----------------------------------------|-------------------------------------|
| <i>CpARR5</i> (evm.TU.supercontig_35.27)    | supercontig_35 582774                 | downstream                              | hypo                                |
| <i>CpACP4</i> (evm.TU.supercontig_16.107)   | supercontig_16 1650440                | downstream                              | hypo                                |
|                                             | supercontig_16 1650483                | downstream                              | hypo                                |
|                                             | supercontig_16 1650494                | downstream                              | hypo                                |
|                                             | supercontig_16 1650702                | introns_3                               | hyper                               |
|                                             | supercontig_16 1650965                | introns_3                               | hypo                                |
| <i>CpAPE2</i> (evm.TU.supercontig_27.1)     | supercontig_27 3873                   | promoter                                | hypo                                |
|                                             | supercontig_27 3879                   | promoter                                | hypo                                |
|                                             | supercontig_27 3894                   | promoter                                | hypo                                |
|                                             | supercontig_27 3896                   | promoter                                | hypo                                |
|                                             | supercontig_27 3916                   | promoter                                | hypo                                |
| <i>CpGsSRK</i> (evm.TU.supercontig_12.8)    | supercontig_12 35657                  | downstream                              | hypo                                |
| <i>CpMAGL4</i> (evm.TU.supercontig_3.339)   | supercontig_3 2346636                 | downstream                              | hyper                               |
|                                             | supercontig_3 2346663                 | downstream                              | hyper                               |
|                                             | supercontig_3 2346896                 | downstream                              | hypo                                |
|                                             | supercontig_3 2349395                 | introns_3                               | hypo                                |
|                                             | supercontig_3 2349563                 | introns_3                               | hypo                                |
|                                             | supercontig_3 2349585                 | introns_3                               | hypo                                |
|                                             | supercontig_3 2351055                 | introns_3                               | hyper                               |
| <i>CpNB-ARC</i> (evm.TU.supercontig_27.143) | supercontig_27 1577031                | promoter                                | hypo                                |
|                                             | supercontig_27 1577296                | promoter                                | hyper                               |
|                                             | supercontig_27 1577333                | promoter                                | hyper                               |
| <i>CpSBT3.3</i> (evm.TU.supercontig_285.9)  | supercontig_285 65031                 | exons_4                                 | hypo                                |
| <i>CpTFIID</i> (evm.TU.supercontig_14.189)  | supercontig_14 2119080                | exons_1                                 | hypo                                |
| <i>CpTLC</i> (evm.TU.supercontig_99.8)      | supercontig_99 114934                 | downstream                              | hyper                               |
|                                             | supercontig_99 118204                 | promoter                                | hypo                                |
| <i>CpUNC</i> (evm.TU.supercontig_14.197)    | supercontig_14 2180370                | downstream                              | hypo                                |
